# Supplementary material for: IFNγ induces epigenetic programming of human T-bethi B cells and promotes TLR7/8 and IL-21 induced differentiation
Source: eLife journal article supplement (doi:10.7554/elife.41641), 2019-05-15
Supplement: supp [file elife_poa_e41641_Transparent_Reporting_File.docx]

***eLife’s* transparent reporting form**

We encourage authors to provide detailed information *within their submission* to facilitate the interpretation and replication of experiments. Authors can upload supporting documentation to indicate the use of appropriate reporting guidelines for health-related research (see [EQUATOR Network](http://www.equator-network.org/%20)), life science research (see the [BioSharing Information Resource](https://biosharing.org/" \t "_blank)), or the [ARRIVE guidelines](http://www.plosbiology.org/article/info:doi/10.1371/journal.pbio.1000412) for reporting work involving animal research. Where applicable, authors should refer to any relevant reporting standards documents in this form.

If you have any questions, please consult our Journal Policies and/or contact us: [editorial@elifesciences.org](mailto:editorial@elifesciences.org).

**Sample-size estimation**

- You should state whether an appropriate sample size was computed when the study was being designed
- You should state the statistical method of sample size computation and any required assumptions
- If no explicit power analysis was used, you should describe how you decided what sample (replicate) size (number) to use

Please outline where this information can be found within the submission (e.g., sections or figure legends), or explain why this information doesn’t apply to your submission:

For the mouse model bone marrow chimera experiments, we performed multiple experiments (3 or more) using the parental lupus prone strain (+control), B6 wild type (- control) and T-bet deficient lupus prone strain (experimental) animals with 5-10 mice/group/experiment. From these preliminary experiments, we determined that group sizes of 4-6 were sufficient to detect statistically significant differences between the groups in each of the experimental readouts (ANA, kidney function, survival). Therefore, when we performed the bone marrow chimera experiments we used 5-10 mice/group/experiment and repeated the experiment 2 times.

For the analysis of human samples, we did not perform power calculations in advance as we did not have preliminary data that could be used for the power calculations. However, after performing initial experiments with ~5 SLE samples and controls, it was clear that the phenotypes we were examining were robust as we observed significant differences between healthy and SLE patients with as few as 3-5 samples/group. Most experiments are shown as combined data with 10-25 individuals/group (from 5+ independent experiments).

**Replicates**

- You should report how often each experiment was performed
- You should include a definition of biological versus technical replication
- The data obtained should be provided and sufficient information should be provided to indicate the number of independent biological and/or technical replicates
- If you encountered any outliers, you should describe how these were handled
- Criteria for exclusion/inclusion of data should be clearly stated
- High-throughput sequence data should be uploaded before submission, with a private link for reviewers provided (these are available from both GEO and ArrayExpress)

Please outline where this information can be found within the submission (e.g., sections or figure legends), or explain why this information doesn’t apply to your submission:

We include information on replicates within each figure legend and indicates whether the replicates are technical replicates and representative of n=x independent experiments and the number of biologic replicates per experiment and number of independent experiments. We did not exclude outliers in any experiment. RNAseq and ATACseq files are uploaded to GEO and accession numbers are provided in methods section.

**Statistical reporting**

- Statistical analysis methods should be described and justified
- Raw data should be presented in figures whenever informative to do so (typically when N per group is less than 10)
- For each experiment, you should identify the statistical tests used, exact values of N, definitions of center, methods of multiple test correction, and dispersion and precision measures (e.g., mean, median, SD, SEM, confidence intervals; and, for the major substantive results, a measure of effect size (e.g., Pearson's r, Cohen's d)
- Report exact p-values wherever possible alongside the summary statistics and 95% confidence intervals. These should be reported for all key questions and not only when the p-value is less than 0.05.

Please outline where this information can be found within the submission (e.g., sections or figure legends), or explain why this information doesn’t apply to your submission:

All statistical analyses are described in each figure legend with N values indicated and any methods of multiple test correction, mean/median/SD/SEM indicated.

(For large datasets, or papers with a very large number of statistical tests, you may upload a single table file with tests, Ns, etc., with reference to sections in the manuscript.)

**Group allocation**

- Indicate how samples were allocated into experimental groups (in the case of clinical studies, please specify allocation to treatment method); if randomization was used, please also state if restricted randomization was applied
- Indicate if masking was used during group allocation, data collection and/or data analysis

Please outline where this information can be found within the submission (e.g., sections or figure legends), or explain why this information doesn’t apply to your submission:

Animals used in the experiments were generated as bone marrow chimeras. Groups of recipient mice were lethally irradiated, randomly distributed into groups of 5-10 and then reconstituted with bone marrow that was pooled from individual animals that were genotyped. No masking was used during any step.

**Additional data files (“source data”)**

- We encourage you to upload relevant additional data files, such as numerical data that are represented as a graph in a figure, or as a summary table
- Where provided, these should be in the most useful format, and they can be uploaded as “Source data” files linked to a main figure or table
- Include model definition files including the full list of parameters used
- Include code used for data analysis (e.g., R, MatLab)
- Avoid stating that data files are “available upon request”

Please indicate the figures or tables for which source data files have been provided:

We provide the source data for RNA-seq and ATAC-seq data as supplemental Tables. We provide a table describing the antibodies used in each analysis (fluorochrome, clone, dilution, company).
