# Supplementary material for: IFNγ induces epigenetic programming of human T-bethi B cells and promotes TLR7/8 and IL-21 induced differentiation
Source: eLife. 2019 May 15;8:e41641. doi: 10.7554/eLife.41641 (PMC6544433; doi:10.7554/eLife.41641)
Supplement: Supplementary file 5. [file elife-41641-supp5.xlsx]

## Sheet: Fig1
	Figure 1	n	Test	Post Test	P Value
	Fig. 1b	HD=20, SLE=40	Mann-Whitney		p<0.0001 (****)
	Fig. 1e	SLE=3	One-Way ANOVA	Dunnett's multiple comparisons test	T-bet(lo) vs. T-bet(hi) -> p=0.0484 (*)	Matched data, T-bet(lo) -> control column
					T-bet(lo) vs. ASCs -> p=0.0098 (**)
	Fig. 1f	SLE=3	One-Way ANOVA	Dunnett's multiple comparisons test	T-bet(lo) vs. T-bet(hi) -> p=0.0218 (*)	Matched data, T-bet(lo) -> control column
					T-bet(lo) vs. ASCs -> p=0.0166 (*)
	Fig. 1g	SLE=18 pairs	Spearman		p<0.0001 (****), r=0.8498
			Pearson		p<0.0001 (****), r=0.8947
	Fig. 1h	SLE=16	Spearman		See Table Below
			T-bet(hi) B(DN) Cells
	Cytokine	n pairs	Spearman r	P Value
	TNFa	SLE=16	0.773	*** (p=0.0007)
	IP10	SLE=16	0.798	*** (p=0.0004)
	IL6	SLE=16	0.797	*** (p=0.0004)
	IFNg	SLE=16	0.495	* (p=0.052)
	IFNa	SLE=16	0.493	* (p=0.054)
	IL8	SLE=16	0.508	* (p=0.047)
	IL12p70	SLE=16	0.53	* (p=0.037)
	IL17	SLE=16	0.222	ns (p=0.157)
	IL27	SLE=16	0.209	ns (p=0.434)
	IL22	SLE=16	0.221	ns (p=0.407)
	IL23	SLE=16	0.218	ns (p=0.515)
	IL17F	SLE=16	0.064	ns (p=0.813)
	IL10	SLE=16	0.018	ns (p=0.949)
	IL21	SLE=16	0.087	ns (p=0.748)
	IL2	SLE=16	0.066	ns (p=0.806)
	Fig. 1i (IFNg)	HD=5, SLE=26	Mann-Whitney		p=0.0007 (***)
	Fig. 1j (CXCL10)	HD=5, SLE=26	Mann-Whitney		p=0.0003 (***)
	Fig. 1k (TNFa)	HD=5, SLE=26	Mann-Whitney		p=0.0003 (***)

## Sheet: Fig2
	Figure 2	n	Test	P Value
	Fig. 2e	HD=15	Wilcoxon	<0.0001 (****)
	Fig. 2f	HD=8	Paired t test	0.0014 (**)
	Fig. 2g	HD=6	Paired t test	0.0164 (*)

## Sheet: Fig3
	Figure 3	n	Test	P Value	Notes
	Fig. 3c	HD=3	Unpaired t test	p=0.0024 (**)	RNA-seq
	Fig. 3l	HD=3	Unpaired t test	p=0.0111 (*)

## Sheet: Fig4
	Figure 4	n	Test	Post Test	Significant?	P Value
	Fig. 4j	HD=3	One-Way ANOVA	Tukey's multiple comparisons test
					# ASCs
				Day6++ vs. Day6 +-	**	0.0045
				Day6++ vs. Day6-+	ns	0.987
				Day6++ vs. Day6--	ns	0.9996
				Day6 +- vs. Day6-+	**	0.003
				Day6 +- vs. Day6--	**	0.0051
				Day6-+ vs. Day6--	ns	0.9717
	(+) or (-) indicates the presence or absence or anti-Ig in first or second step
	Fig. 4l	HD=3	One-Way ANOVA	Tukey's multiple comparisons test
					# ASCs
		A = All		Day6_A vs. Day6_B	*	0.0255
		B = -R848		Day6_A vs. Day6_C	*	0.022
		C = -IFNg		Day6_A vs. Day6_D	*	0.0218
		D = -IL-21		Day6_A vs. Day6_E	ns	0.6608
		E = -Baff		Day6_A vs. Day6_F	ns	0.0678
		F = -IL-2		Day6_B vs. Day6_C	ns	>0.9999
				Day6_B vs. Day6_D	ns	>0.9999
				Day6_B vs. Day6_E	ns	0.2883
				Day6_B vs. Day6_F	ns	0.9904
				Day6_C vs. Day6_D	ns	>0.9999
				Day6_C vs. Day6_E	ns	0.2554
				Day6_C vs. Day6_F	ns	0.9823
				Day6_D vs. Day6_E	ns	0.2532
				Day6_D vs. Day6_F	ns	0.9816
				Day6_E vs. Day6_F	ns	0.5797

## Sheet: Fig5
	Figure 5	n	Test	Post Test	Significant?	P Value
	Fig. 5b	HD=3	One-Way ANOVA	Tukey's multiple comparisons test
	role of IFNg				% ASCs
	in 1st and 2nd Step
				Day6+- vs. Day6 -+	**	0.0013
				Day6+- vs. Day6 ++	ns	0.9629
				Day6-+ vs. Day6 ++	**	0.0016
	Fig. 5c	HD=3	One-Way ANOVA	Tukey's multiple comparisons test
	role of IFNg				# ASCs
	in 1st and 2nd Step
				Day6+- vs. Day6 -+	****	<0.0001
				Day6+- vs. Day6 ++	ns	0.3669
				Day6-+ vs. Day6 ++	****	<0.0001
	Fig. 5e	HD=3	One-Way ANOVA	Tukey's multiple comparisons test
	role of IFNg				# CD19+
	in 1st and 2nd Step
				Day6+- vs. Day6 -+	***	0.0002
				Day6+- vs. Day6 ++	ns	0.2941
				Day6-+ vs. Day6 ++	****	<0.0001
	Figure 5	n	Test	Post Test	Significant?	P Value
	Fig. 5f	HD=3	One-Way ANOVA	Tukey's multiple comparisons test
	role of R848				% ASCs
	in 1st and 2nd Step
				Day6+- vs. Day6 -+	****	<0.0001
				Day6+- vs. Day6 ++	***	0.0002
				Day6-+ vs. Day6 ++	ns	0.2408
	Fig. 5g	HD=3	One-Way ANOVA	Tukey's multiple comparisons test
	role of R848				# ASCs
	in 1st and 2nd Step
				Day6+- vs. Day6 -+	****	<0.0001
				Day6+- vs. Day6 ++	****	<0.0001
				Day6-+ vs. Day6 ++	*	0.0411
	Fig. 5i	HD=3	One-Way ANOVA	Tukey's multiple comparisons test
	role of R848				# CD19+
	in 1st and 2nd Step
				Day6+- vs. Day6 -+	**	0.0021
				Day6+- vs. Day6 ++	****	<0.0001
				Day6-+ vs. Day6 ++	**	0.0092
	Figure 5	n	Test	Post Test	Significant?	P Value
	Fig. 5j	HD=3	One-Way ANOVA	Tukey's multiple comparisons test
	role of IL21				% ASCs
	in 1st and 2nd Step
				Day6+- vs. Day6 -+	**	0.0077
				Day6+- vs. Day6 ++	****	<0.0001
				Day6-+ vs. Day6 ++	**	0.0011
	Fig. 5k	HD=3	One-Way ANOVA	Tukey's multiple comparisons test
	role of IL21				# ASCs
	in 1st and 2nd Step
				Day6+- vs. Day6 -+	***	0.0002
				Day6+- vs. Day6 ++	***	0.0002
				Day6-+ vs. Day6 ++	ns	0.9621
	Fig. 5m	HD=3	One-Way ANOVA	Tukey's multiple comparisons test
	role of IL21				# CD19+
	in 1st and 2nd Step
				Day6+- vs. Day6 -+	***	0.0003
				Day6+- vs. Day6 ++	***	0.0006
				Day6-+ vs. Day6 ++	ns	0.7029

## Sheet: Fig6
	Figure 6	n	Test	Post Test	Significant?	P Value
	Fig. 6g	HD=2	One-Way ANOVA	Tukey's multiple comparisons test
		n=6
					Day6_# CD19+
				Be0 vs. Be.IFNg	****	<0.0001
				Be0 vs. Be.IL2	ns	0.1275
				Be0 vs. Be.g2	****	<0.0001
				Be.IFNg vs. Be.IL2	****	<0.0001
				Be.IFNg vs. Be.g2	****	<0.0001
				Be.IL2 vs. Be.g2	****	<0.0001
	Fig. 6h	HD=2	One-Way ANOVA	Tukey's multiple comparisons test
		n=6
					Day6_% ASCs
				Be0 vs. Be.IFNg	****	<0.0001
				Be0 vs. Be.IL2	****	<0.0001
				Be0 vs. Be.g2	****	<0.0001
				Be.IFNg vs. Be.IL2	ns	0.6371
				Be.IFNg vs. Be.g2	ns	0.0845
				Be.IL2 vs. Be.g2	**	0.0067
	Fig. 6i	HD=2	One-Way ANOVA	Tukey's multiple comparisons test
		n=6
					Day6_# ASCs
				Be0 vs. Be.IFNg	****	<0.0001
				Be0 vs. Be.IL2	ns	0.189
				Be0 vs. Be.g2	****	<0.0001
				Be.IFNg vs. Be.IL2	****	<0.0001
				Be.IFNg vs. Be.g2	****	<0.0001
				Be.IL2 vs. Be.g2	****	<0.0001
	Fig. 6j	HD=3	One-Way ANOVA	Tukey's multiple comparisons test
				Basal	pSTAT3
				Be0 vs. Be.IFNg	*	0.0144
				Be0 vs. Be.IL2	ns	0.9509
				Be0 vs. Be.g2	****	<0.0001
				Be.IFNg vs. Be.IL2	*	0.0293
				Be.IFNg vs. Be.g2	**	0.0025
				Be.IL2 vs. Be.g2	****	<0.0001
	Fig. 6k	HD=3	One-Way ANOVA	Tukey's multiple comparisons test
				IL21, 20min	pSTAT3
				Be0 vs. Be.IFNg	****	<0.0001
				Be0 vs. Be.IL2	***	0.0005
				Be0 vs. Be.g2	****	<0.0001
				Be.IFNg vs. Be.IL2	****	<0.0001
				Be.IFNg vs. Be.g2	ns	0.5554
				Be.IL2 vs. Be.g2	****	<0.0001

## Sheet: Fig7
	Figure 7	n	Test	Post Test	Significant?	P Value					HD=2
											Student's t-Test
											Fig. 7d	Fig. 7e	Fig. 7f	Fig. 7g	Fig. 7h	Fig. 7i
	Fig. 7b	HD=2	One-Way ANOVA	Tukey's multiple comparisons test							TBET	STAT5	REL	p65	IRF4	BLIMP1
		n=6									P value	P value	P value	P value	P value	P value
					Day3_# CD19+				Be.0 v	Be.IL2	0.05	< 2.2e-16	1.156e-14	< 2.2e-16	0.55	0.9119
										Be.g	< 2.2e-16	< 2.2e-16	< 2.2e-16	< 2.2e-16	< 2.2e-16	< 2.2e-16
				Be0 vs. Be.IFNg	****	<0.0001				Be.g2	< 2.2e-16	< 2.2e-16	< 2.2e-16	< 2.2e-16	< 2.2e-16	< 2.2e-16
				Be0 vs. Be.IL2	*	0.0237
				Be0 vs. Be.g2	****	<0.0001			Be.g v	Be.IL2	< 2.2e-16	< 2.2e-16	0.306	0.037	< 2.2e-16	< 2.2e-16
				Be.IFNg vs. Be.IL2	*	0.018				Be.g2	< 2.2e-16	< 2.2e-16	< 2.2e-16	< 2.2e-16	< 2.2e-16	< 2.2e-16
				Be.IFNg vs. Be.g2	ns	0.6901
				Be.IL2 vs. Be.g2	**	0.0015			Be.g2 v	Be.IL2	< 2.2e-16	< 2.2e-16	< 2.2e-16	< 2.2e-16	< 2.2e-16	< 2.2e-16

## Sheet: Fig8
	Figure 8	n	Test	Post Test	Significant?	P Value
	Fig. 8d	SLE=1	One-Way ANOVA	Tukey's multiple comparisons test
		triplicate
					# ASCs
				Day6++ vs. Day6 +-	****	<0.0001
				Day6+- vs. Day6--	****	<0.0001
				Day6++ vs. Day6--	ns	0.1515
	(+) or (-) indicates the presence or absence or anti-Ig in first or second step
	Fig. 8e	SLE=3	One-Way ANOVA	Tukey's multiple comparisons test
				SW vs. T-bet(lo)B(DN)	*	p=0.0123
				SW vs. T-bet(hi)B(DN)	****	p<0.0001
				SW vs. Naïve	****	p<0.0001
				T-bet(lo)B(DN) vs. T-bet(hi)B(DN)	***	p=0002
				T-bet(lo)B(DN) vs. Naïve	****	p<0.0001
				T-bet(hi) vs. Naïve	**	p<0.0011

## Sheet: Fig1_fs1
		Fig1_figure SUPPL 1	n	Test	P Value
		Fig1_figSuppl 1c	20%Control=9	Unpaired t test	0.004 (**)
			B-YF.Tbx21-/-=10
		Fig1_figSuppl 1d	20%Control=9	Unpaired t test	0.0471 (*)
			B-YF.Tbx21-/-=10
		Fig1_figSuppl 1e	20%Control=7	Log-rank (Mantel-Cox)	0.0231 (*)
			B-YF.Tbx21-/-=9

## Sheet: Fig2_fs1
	Fig2_figure SUPPL 1	n	Test	Post Test	Significant?	P Value
	Fig2_figSuppl 1c (IFNg)	HD=5	One-Way ANOVA	Tukey's multiple comparisons test
					IFNg
				Th1 Nil vs. Th1 aCD3aCD28	**	0.0021
				Th1 Nil vs. Th2 Nil	*	0.0192
				Th1 Nil vs. Th2 aCD3aCD28	*	0.0443
				Th1 aCD3aCD28 vs. Th2 Nil	****	<0.0001
				Th1 aCD3aCD28 vs. Th2 aCD3aCD28	****	<0.0001
				Th2 Nil vs. Th2 aCD3aCD28	ns	0.5539
	Fig2_figSuppl 1c (IL-8)	HD=5	One-Way ANOVA	Tukey's multiple comparisons test
					IL-8
				Th1 Nil vs. Th1 aCD3aCD28	****	<0.0001
				Th1 Nil vs. Th2 Nil	ns	0.2896
				Th1 Nil vs. Th2 aCD3aCD28	ns	0.5499
				Th1 aCD3aCD28 vs. Th2 Nil	****	<0.0001
				Th1 aCD3aCD28 vs. Th2 aCD3aCD28	****	<0.0001
				Th2 Nil vs. Th2 aCD3aCD28	ns	0.1492
	Fig2_figSuppl 1c (IL-4)	HD=5	One-Way ANOVA	Tukey's multiple comparisons test
					IL-4
				Th1 Nil vs. Th1 aCD3aCD28	*	0.0466
				Th1 Nil vs. Th2 Nil	ns	0.9598
				Th1 Nil vs. Th2 aCD3aCD28	****	<0.0001
				Th1 aCD3aCD28 vs. Th2 Nil	ns	0.1159
				Th1 aCD3aCD28 vs. Th2 aCD3aCD28	*	0.0148
				Th2 Nil vs. Th2 aCD3aCD28	***	0.0001
	Fig2_figSuppl 1c (IL-5)	HD=5	One-Way ANOVA	Tukey's multiple comparisons test
					IL-5
				Th1 Nil vs. Th1 aCD3aCD28	ns	0.9996
				Th1 Nil vs. Th2 Nil	ns	0.9649
				Th1 Nil vs. Th2 aCD3aCD28	*	0.0269
				Th1 aCD3aCD28 vs. Th2 Nil	ns	0.9822
				Th1 aCD3aCD28 vs. Th2 aCD3aCD28	*	0.0327
				Th2 Nil vs. Th2 aCD3aCD28	ns	0.0665
	Fig2_figSuppl 1c (IL-13)	HD=5	One-Way ANOVA	Tukey's multiple comparisons test
					IL-6
				Th1 Nil vs. Th1 aCD3aCD28	ns	0.3484
				Th1 Nil vs. Th2 Nil	ns	0.3971
				Th1 Nil vs. Th2 aCD3aCD28	****	<0.0001
				Th1 aCD3aCD28 vs. Th2 Nil	ns	0.9997
				Th1 aCD3aCD28 vs. Th2 aCD3aCD28	***	0.0005
				Th2 Nil vs. Th2 aCD3aCD28	***	0.0004

[truncated: 1 more sheets: Fig4_fs1]
