# Supplementary figures and images for: IFNγ induces epigenetic programming of human T-bethi B cells and promotes TLR7/8 and IL-21 induced differentiation
Source: eLife journal article supplement (doi:10.7554/elife.41641), 2019-05-15

Figure 3 - figure supplement 1

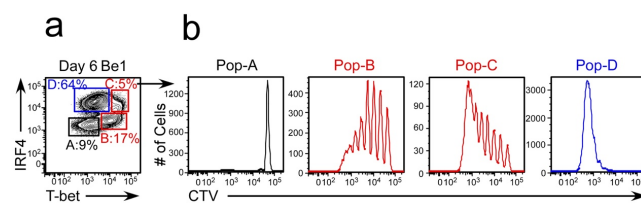

Supplement: supp [file elife-41641-supp-v1.zip]

Figure 8 - figure supplement 1

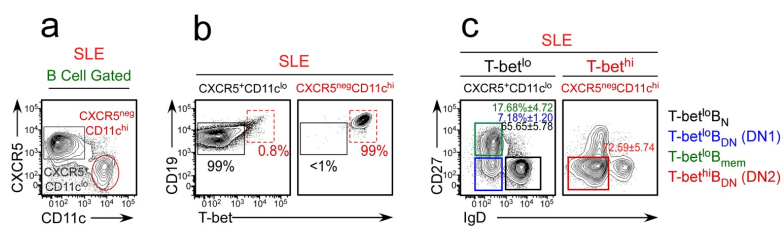

Supplement: supp [file elife-41641-supp-v1.zip]

Figure 7 - figure supplement 1

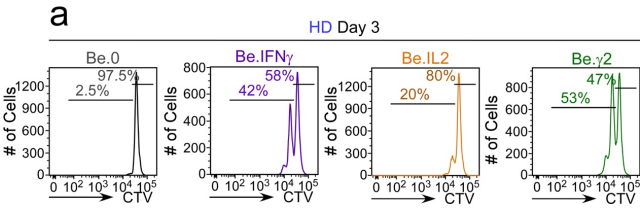

Supplement: supp [file elife-41641-supp-v1.zip]

**Figure 5 - figure supplement 1**

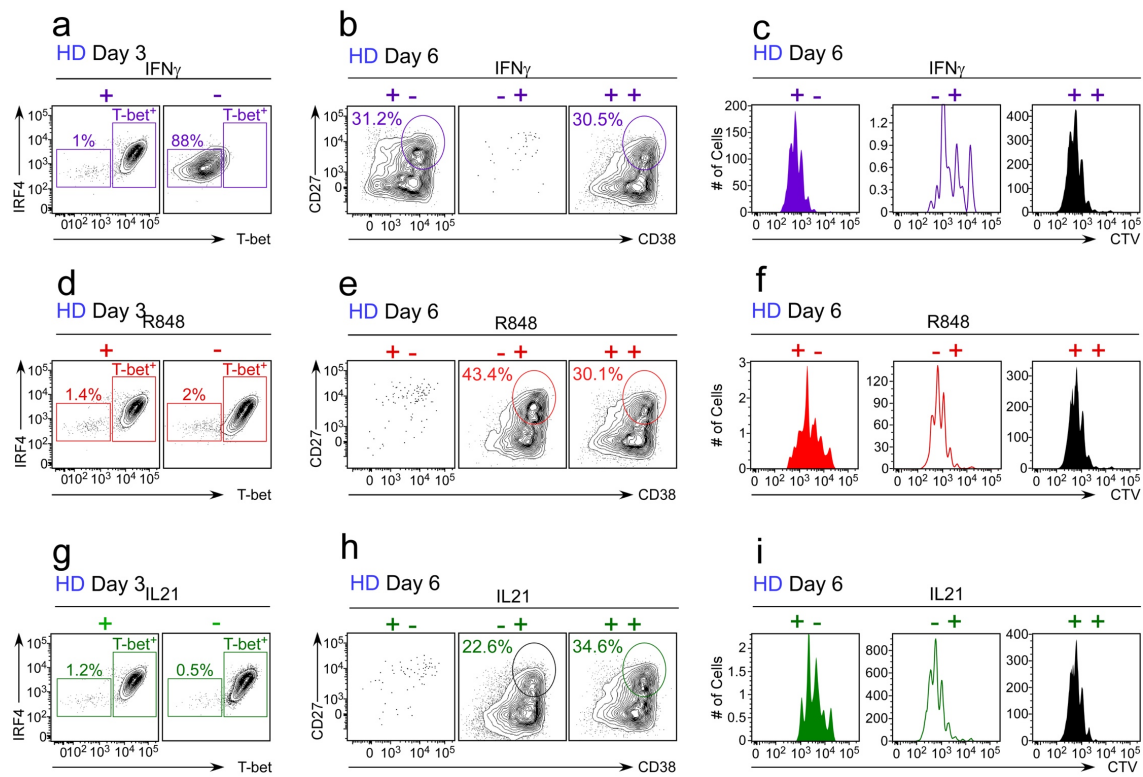

Supplement: supp [file elife-41641-supp-v1.zip]

Figure 1- figure supplement 1

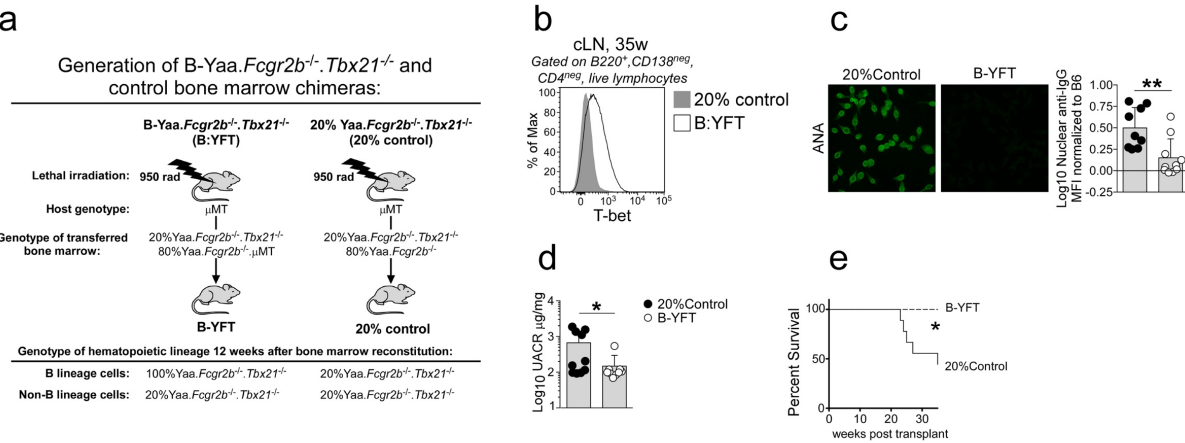

Supplement: supp [file elife-41641-supp-v1.zip]

Figure 2 - figure supplement 2

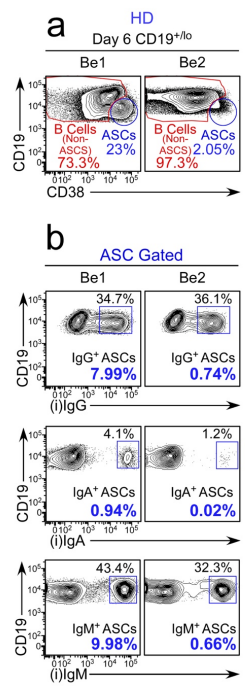

Supplement: supp [file elife-41641-supp-v1.zip]

Figure 2 - figure supplement 1

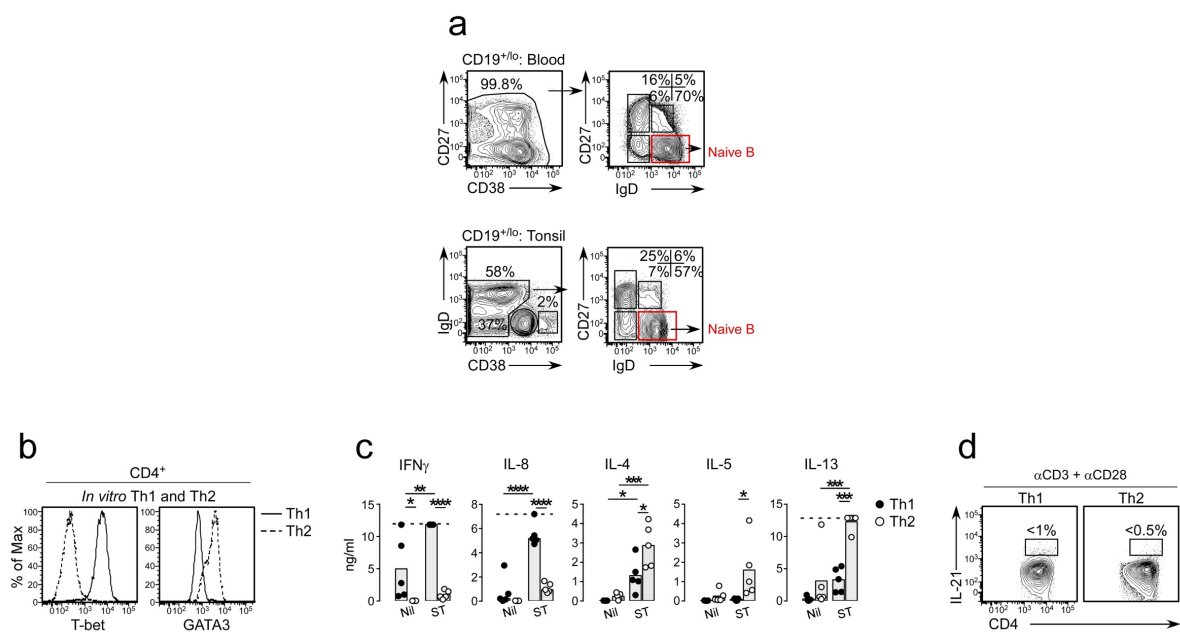

Supplement: supp [file elife-41641-supp-v1.zip]

Figure 6 - figure supplement 3

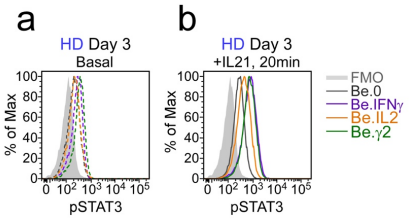

Supplement: supp [file elife-41641-supp-v1.zip]

Figure 6 - figure supplement 1

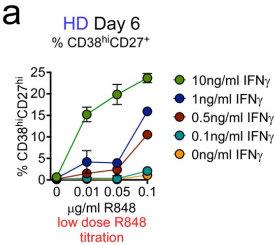

Supplement: supp [file elife-41641-supp-v1.zip]

**Figure 1 - figure supplement 2**

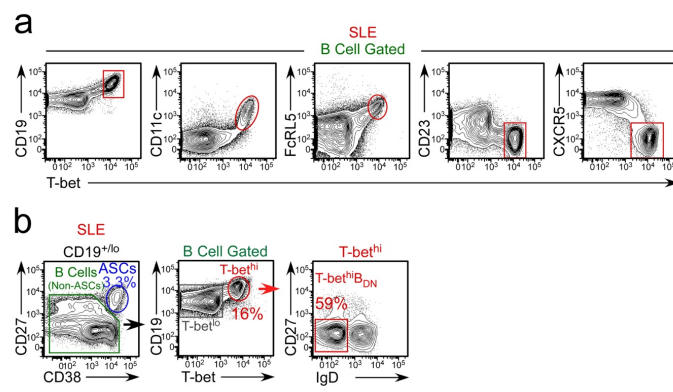

Supplement: supp [file elife-41641-supp-v1.zip]

Figure 2 - figure supplement 3

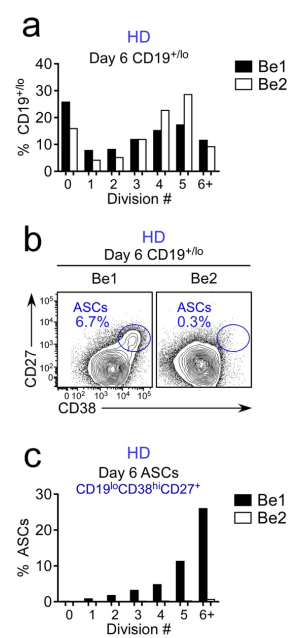

Supplement: supp [file elife-41641-supp-v1.zip]

Figure 4 - figure supplement 1

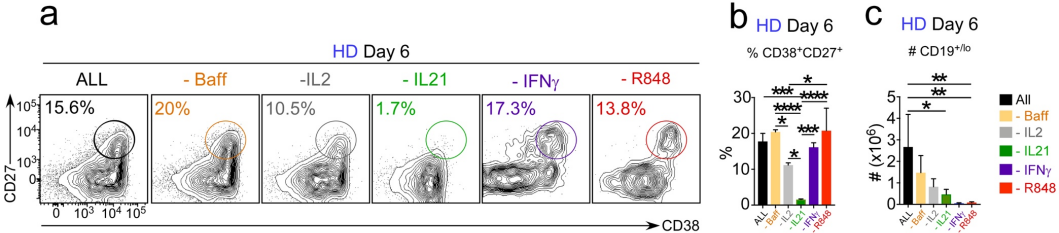

Supplement: supp [file elife-41641-supp-v1.zip]

Figure 6 - figure supplement 2

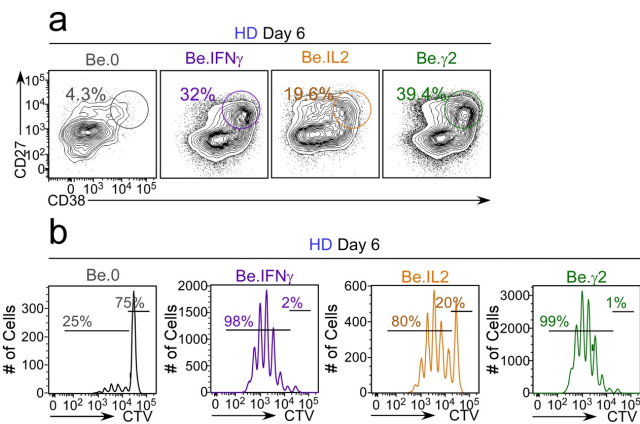

Supplement: supp [file elife-41641-supp-v1.zip]
